# Supplementary material for: A thumb-size electrochemical system for portable sensors
Source: Royal Society of Chemistry journal article supplement (doi:10.1039/c8an00645h), 2018-01-01
Supplement: c8an00645h1.pdf [file c8an00645h1.pdf]

## Supporting Information

# A Thumb-Size Electrochemical System for Portable Sensors

Zhen Gu<sup>a</sup>, Hui-Xin Liu<sup>b</sup>, Yi-Lun Ying<sup>a\*</sup>, Guangli Xu<sup>b</sup>, Yi-Tao Long<sup>a\*</sup>

<sup>a</sup>Key Laboratory for Advanced Materials & School of Chemistry and Molecular Engineering, East China University of Science and Technology, Shanghai 200237, P. R. China.

<sup>b</sup> School of Resources and Environmental Engineering, East China University of Science and Technology, Shanghai 200237, P. R. China.

### **Fabrication of the Screen Printed Electrodes**

The SPE electrode pattern was printed onto the glass fiber plates through an automatic printing machine (AT-25P, ATMA Champ Ent. Co.). Silver ink (JT-1000, JVLONG Co. Ltd.) was firstly patterned on the substrate as conductive medium and cured at 100 °C for 10 min. Then the work electrode (planar area: 28.26 mm<sup>2</sup>) and counter electrode were printed by using carbon ink (EDAG 423SS, LOCTITE Co.) and dried at 90 °C for 10 min. The Ag/AgCl ink (JLL-1000, JVLONG Co. Ltd.) was printed as reference electrode. Finally, the insulating ink (TP-40, JINYI Co. Ltd.) was printed as the insulation layer. Fresh SPEs were used in the experiments without pretreatment.

### **Quantitative Determination of Cd<sup>2+</sup> and Pb<sup>2+</sup> in river water by the MiniEC**

To evaluate the usefulness of the MiniEC in heavy metal detection, the river water sample was collected and analyzed for trace of Cd<sup>2+</sup> and Pb<sup>2+</sup>. Sample solutions were prepared using the river water with addition of acetate to a final concentration of 0.1 M. Pb(NO<sub>3</sub>)<sub>2</sub> and Cd(NO<sub>3</sub>)<sub>2</sub> was added into the sample solution for detection at different concentrations (0, 1, 2, 3, 5 μg/L). The Bi-coated SPE was used after the calibration curves were measured (**Figure 5**). DPASV was used to determine the concentration of Cd<sup>2+</sup> and Pb<sup>2+</sup> in the sample solutions by using the same parameters as described in the

manuscript (**Figure S1**). As a result, the river water spiked with a mixture of the  $\text{Cd}^{2+}$  and  $\text{Pb}^{2+}$  gave recoveries of 92.1-108.9% (**Table S1**). This demonstrated that the river water sample had virtually no effect on the performance of the method proposed.

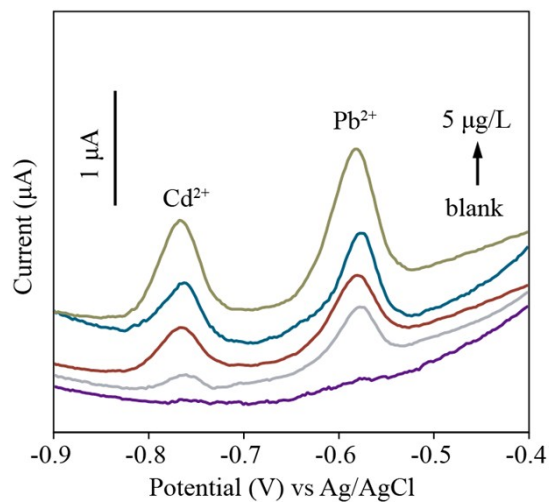

**Figure S1.** Voltammogram for  $\text{Cd}^{2+}$  and  $\text{Pb}^{2+}$  at different concentrations (0, 1, 2, 3, 5  $\mu\text{g/L}$ ) in river water

**Table S1. Peak current of  $\text{Cd}^{2+}$  and  $\text{Pb}^{2+}$  in Figure S1 and the value of recovery.**

| Add amount ( $\mu\text{g/L}$ ) | Peak current of $\text{Cd}^{2+}$ ( $\mu\text{A}$ ) | Recovery of $\text{Cd}^{2+}$ (%) | Peak current of $\text{Pb}^{2+}$ ( $\mu\text{A}$ ) | Recovery of $\text{Pb}^{2+}$ (%) |
|--------------------------------|----------------------------------------------------|----------------------------------|----------------------------------------------------|----------------------------------|
| 1                              | 0.1422                                             | 92.6                             | 0.4153                                             | 108.9                            |
| 2                              | 0.3585                                             | 108.9                            | 0.5729                                             | 101.1                            |
| 3                              | 0.4651                                             | 92.1                             | 0.8121                                             | 108.0                            |
| 5                              | 0.8112                                             | 94.8                             | 1.1915                                             | 106.1                            |
